# Supplementary material
Source: PubMed Central journal article supplement (PMC5886286)
Supplement: ddx206_table_s1.pdf [file ddx206_table_s1.pdf]

Table S1: Primers

| Primers Used For Genotyping |                                                  |  |
|-----------------------------|--------------------------------------------------|--|
| A17 Allele Primers          |                                                  |  |
| F                           | 5' CACCTACCGGGTTTAGAGAATTTGGCAC 3'               |  |
| R                           | 5' ATAACTTCGTATAATGTATGCTATACGAAGTTATTTCGAAAG 3' |  |
| Floxed Allele Primers       |                                                  |  |
| F                           | 5' GGACGACGGCAACTACAAGA 3'                       |  |
| R                           | 5' CTCGATGTTGTGGCGGATCT 3'                       |  |
| A17/WT Primers              |                                                  |  |
| F                           | 5' GACTGACTAATGAATCCTCGGCG 3'                    |  |
| R                           | 5' CTCAACCAGTCCCGGCTCTC 3'                       |  |
| KO genotyping primers       |                                                  |  |
| F                           | 5' GAGAGCAAGGTTACCTGTCGCAC 3'                    |  |
| F                           | 5' GGAAGACTGCAGCGTGGCAGAAG 3'                    |  |
| R                           | 5' TAAATGAGACAAAGGAAGGCACAAGACTATC 3'            |  |

| Primers Used For qPCR                  |                                |           |
|----------------------------------------|--------------------------------|-----------|
| <i>Pabpn1</i>                          | QIAGEN #                       | PPM25445A |
| <i>18S rRNA</i>                        | QIAGEN #                       | PPM57735E |
| <i>Gapdh</i>                           | QIAGEN #                       | PPM02946E |
| <i>Hprt</i>                            | QIAGEN #                       | PPM03559F |
| <i>Ddit4l</i> Coding Sequence Primers  |                                |           |
| F                                      | 5' GAGGGAAACAGAGCCGTTGA 3'     |           |
| R                                      | 5' GTGATAGCCACCGTCCAACA 3'     |           |
| <i>Ddit4l</i> Distal Primers           |                                |           |
| F                                      | 5' ACTACCAGCTTCCTCCCTGA 3'     |           |
| R                                      | 5' AAGGTGATGTTTTAATCCAGCGG 3'  |           |
| <i>Slc25a4</i> Coding Sequence Primers |                                |           |
| F                                      | 5' GGTACTTCCCCTCAAGCC 3'       |           |
| R                                      | 5' AGCAAAGTAGCGCCAGAACT 3'     |           |
| <i>Slc25a4</i> Distal Primers          |                                |           |
| F                                      | 5' AGATTCCCACAGAAAACAGGCT 3'   |           |
| R                                      | 5' GTCACACTGAGTTACTTTTCAGCA 3' |           |
| <i>Mcts1</i> Coding Sequence Primers   |                                |           |
| F                                      | 5' TCGTGCTGGACCCTTCCTAA 3'     |           |
| R                                      | 5' GGTGAAAGGGGCGACGATAG 3'     |           |
| <i>Mcts1</i> Distal Primers            |                                |           |
| F                                      | 5' TCGTGCTGGACCCTTCCTAA 3'     |           |
| R                                      | 5' GGTGAAAGGGGCGACGATAG 3'     |           |
| Dio3 Primers (39)                      |                                |           |
| F                                      | 5' GGAGGTTGTCCGACCTGAT 3'      |           |
| R                                      | GTCCTTGTGCGTAGTCGAG            |           |
| mtCox1 Primers (39)                    |                                |           |
| F                                      | 5' TCTCCCTCTCTACGCATTCTA 3'    |           |
| R                                      | 5' ACGGATTGGAAGTTCTATTGGC 3'   |           |
| mtCox3 Primers (39)                    |                                |           |
| F                                      | 5' TAGCCTCGTACCAACACATGA 3'    |           |
| R                                      | 5' AGTGGTGAAATTCCTGTTGGA 3'    |           |
