# Supplementary material
Source: PubMed Central journal article supplement (PMC5886286)

**A**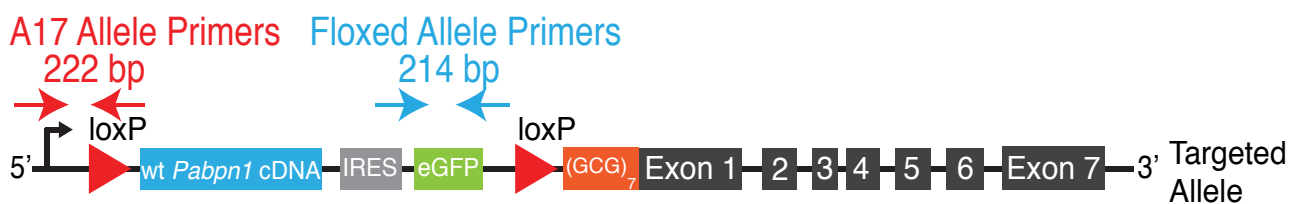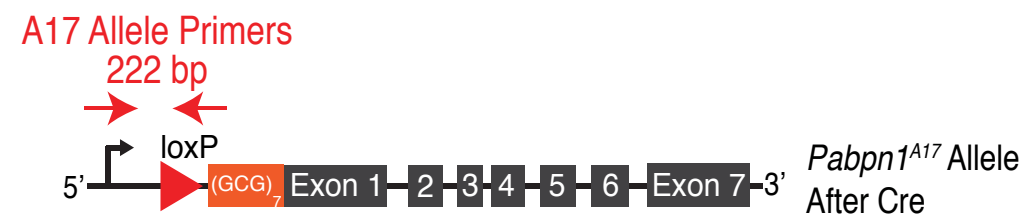**B**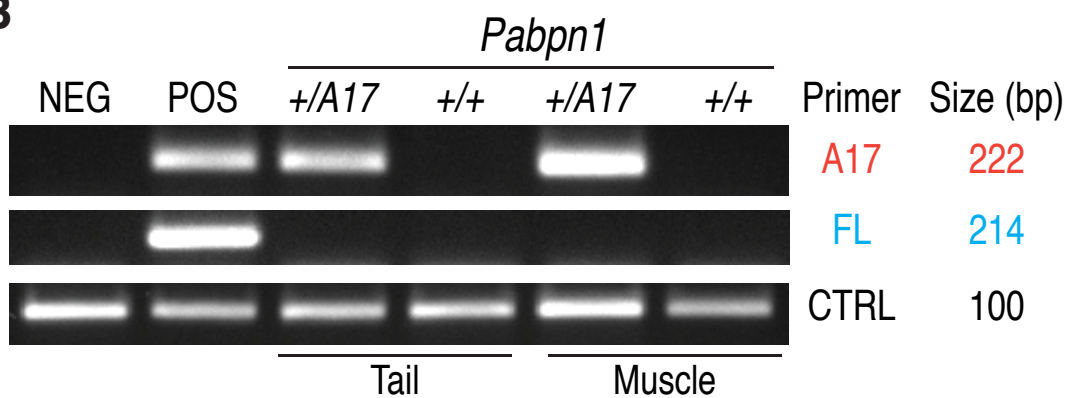**C**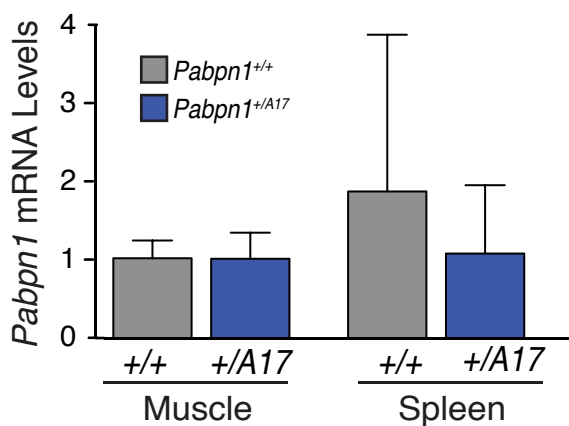

# Figure S2

Vest et al.

*Pabpn1*

---

+/+

+/A17

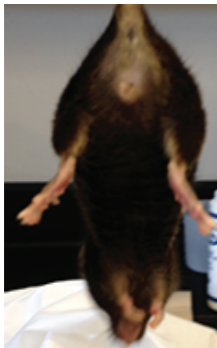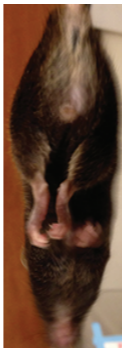

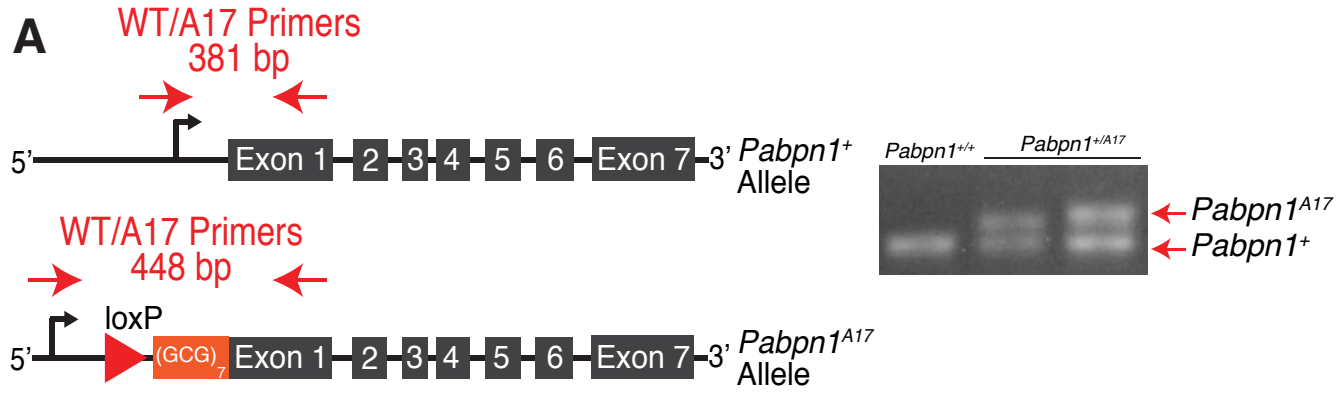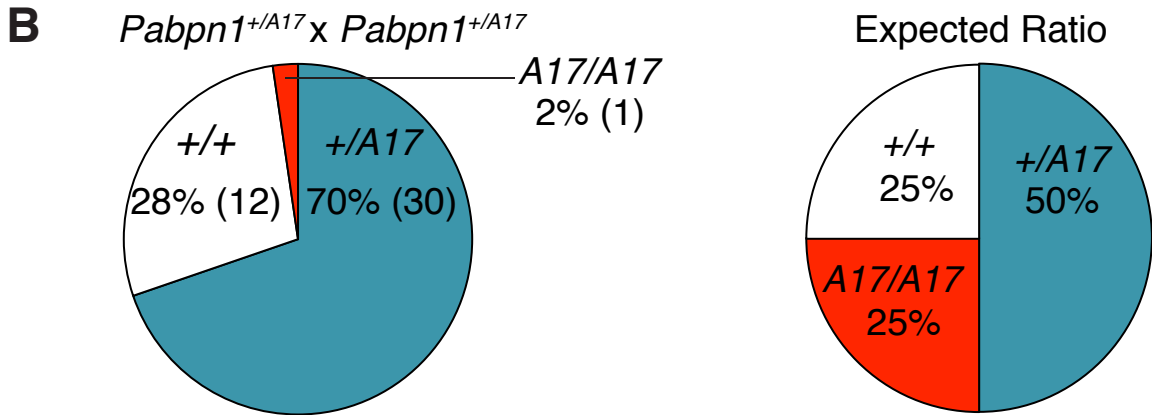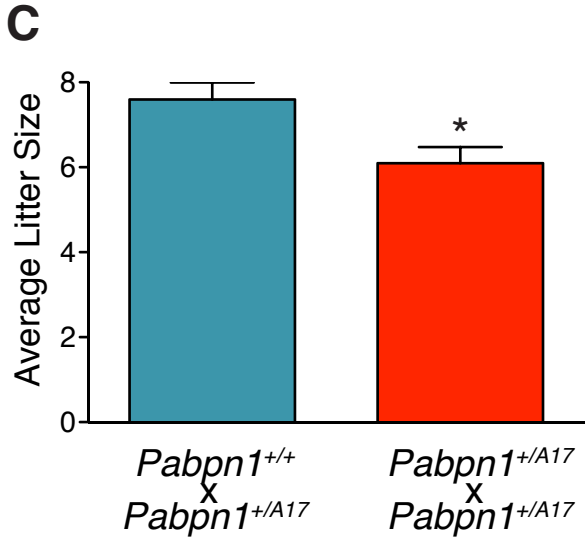

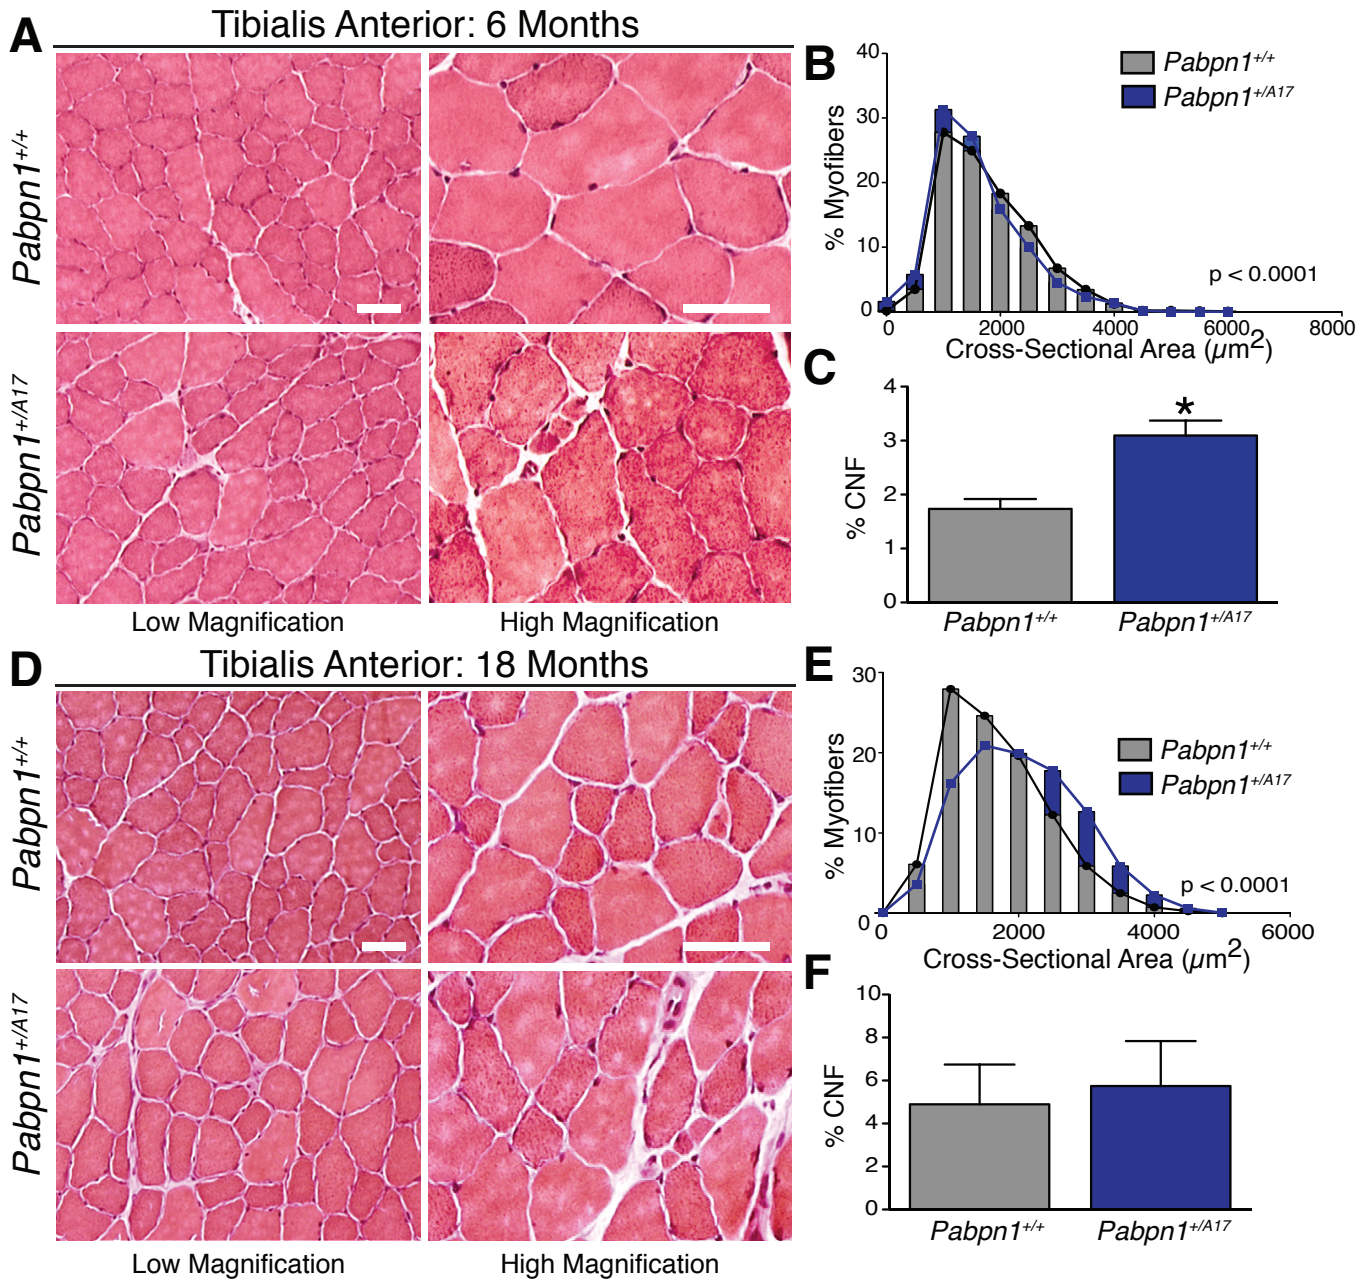

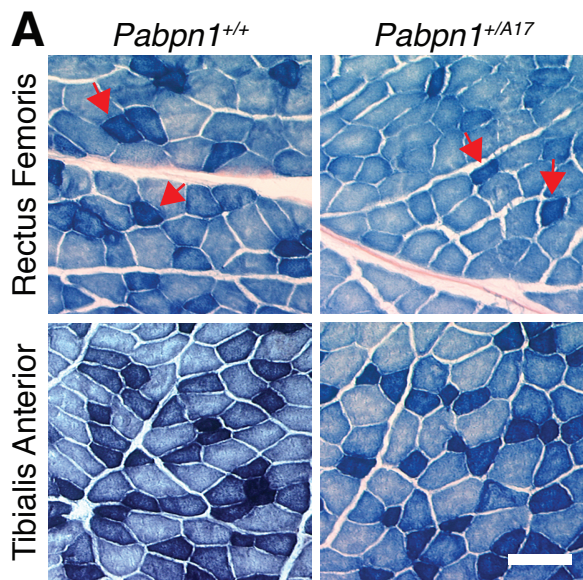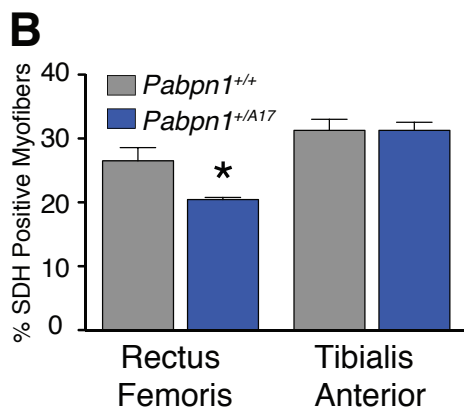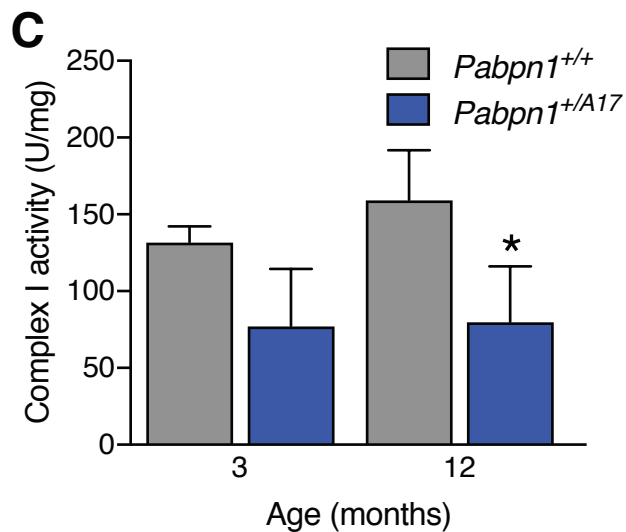

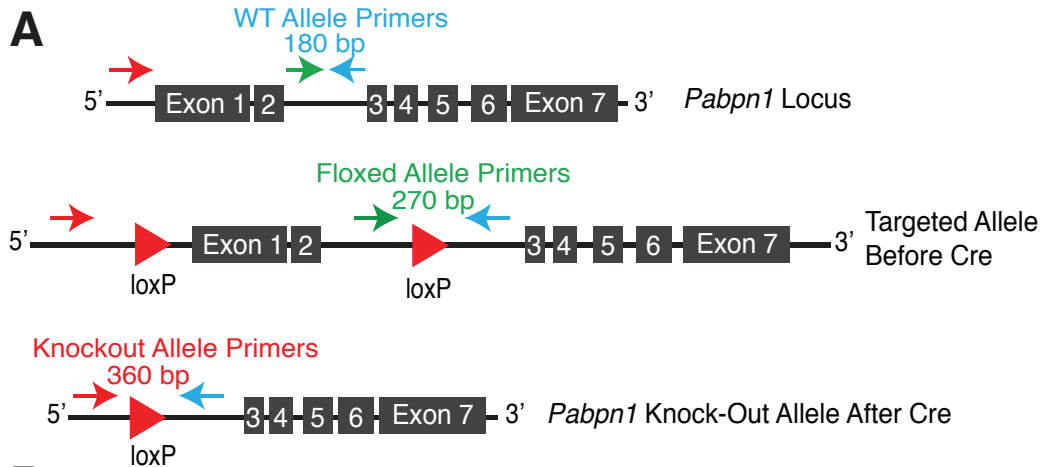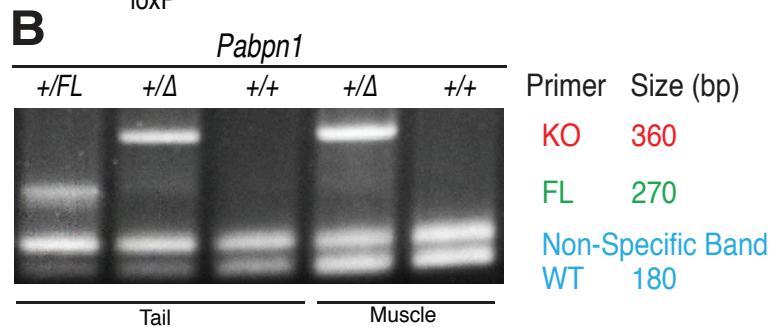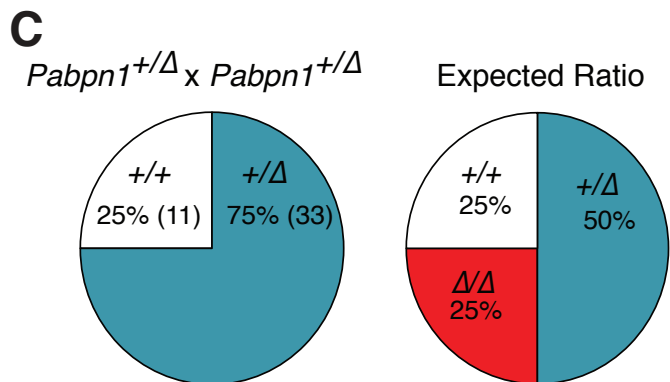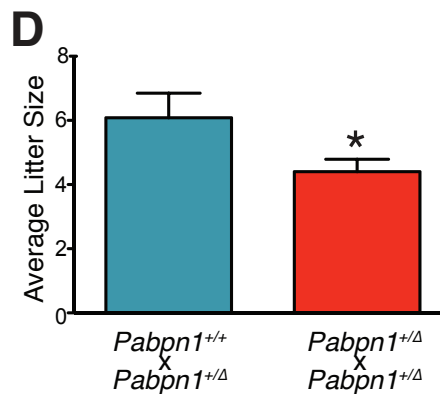

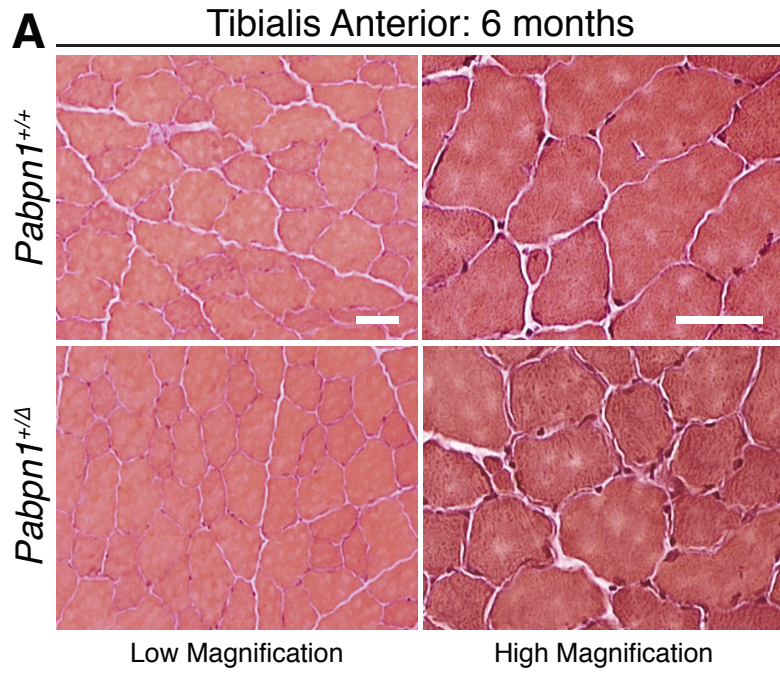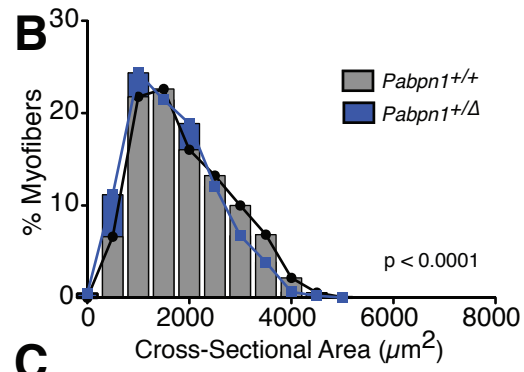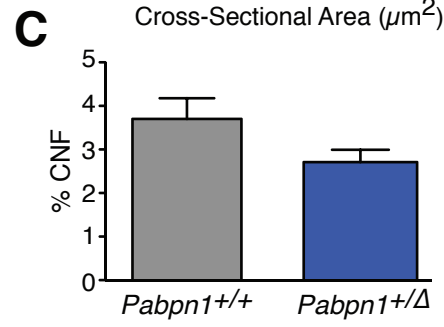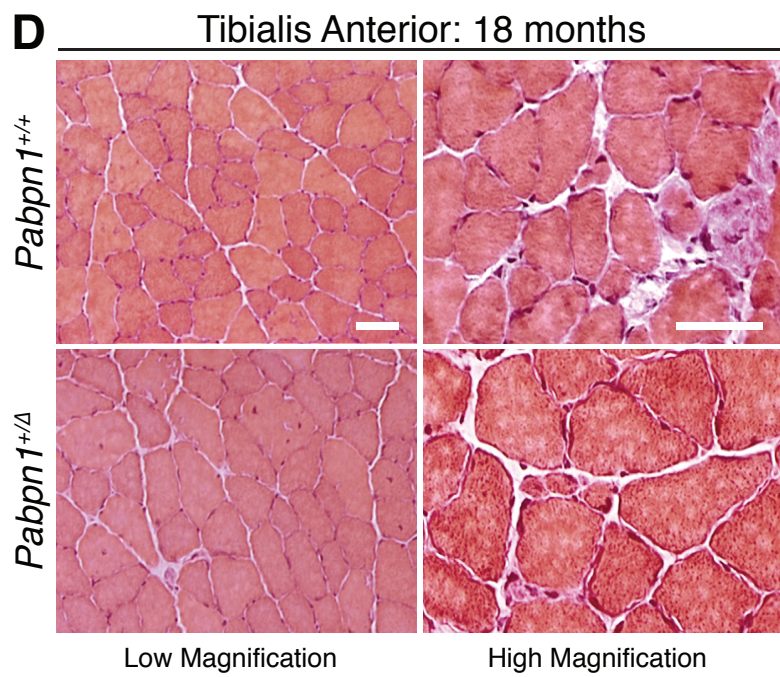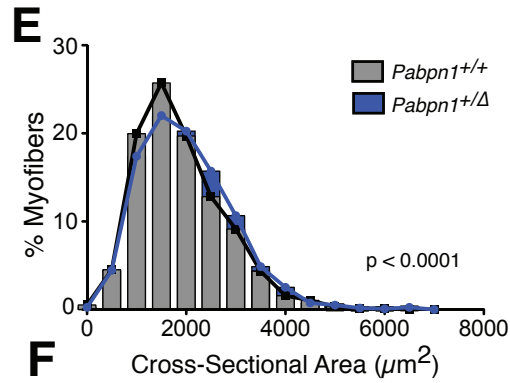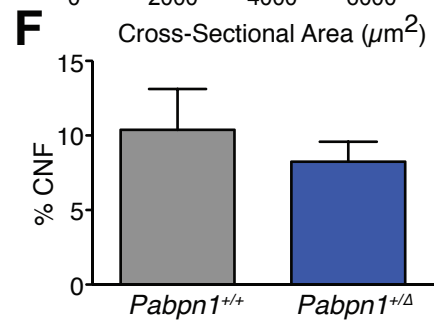

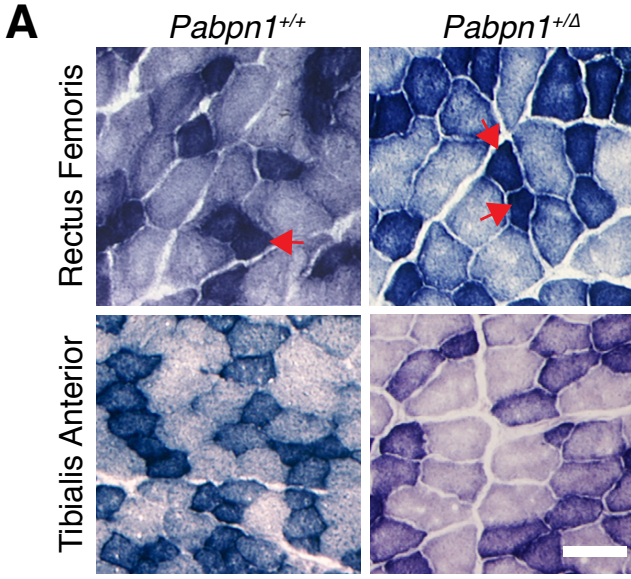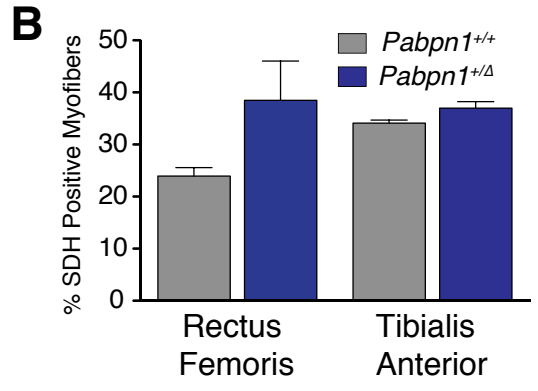

Supplement: ddx206_vest_et_al_supplemental_figures.pdf [file ddx206_vest_et_al_supplemental_figures.pdf]
